# Supplementary material for: A green and efficient oxidation of alcohols by supported gold catalysts using aqueous H2O2 under organic solvent-free conditions
Source: Royal Society of Chemistry journal article supplement (doi:10.1039/b820197h), 2009-01-01

# **A green and efficient oxidation of alcohols by supported gold catalysts using aqueous H<sub>2</sub>O<sub>2</sub> under organic solvent-free conditions**

**Ji Ni, Wen-Jian Yu, Lin He, Hao sun, Yong Cao,\* He-Yong He, and Kang-Nian Fan**

*Department of chemistry & Shanghai key laboratory of molecular catalysis and innovative material, Fudan University, Shanghai 200433, P. R. China.*

## **Electronic Supplementary Information**

### **1. Catalytic materials.**

Gold catalysts including 1.5 wt % Au/TiO<sub>2</sub> (type A, lot no. Au/TiO<sub>2</sub> no. 02-1), 4.5 wt % Au/Fe<sub>2</sub>O<sub>3</sub> (type C, lot no. Au/Fe<sub>2</sub>O<sub>3</sub> no. 02-5) and 0.8 wt % Au/C (type D, lot no. Au/C no. 38D) were supplied by the World Gold Council (WGC). 1 wt % Au/TiO<sub>2</sub> and 0.9 wt % Au/Al<sub>2</sub>O<sub>3</sub> were supplied by Mintek. Unless otherwise specified, all catalysts were activated by calcination in air at 300 °C for 2 h before using.

Mintek Au/TiO<sub>2</sub> catalysts calcined at elevated temperatures: a series of 1 wt % Au/TiO<sub>2</sub> catalysts with mean gold particle size of ca. 2.7, 3.5, 4.3 and 7.2 nm was obtained by being respectively calcined in air at 300 °C, 400 °C and 500 °C for 2 h and 500 °C for 6 h.

Preparation of Au/CeO<sub>2</sub> catalysts: 1 wt % Au/CeO<sub>2</sub> catalysts were prepared by deposition-precipitation method. Firstly, 100 ml of a gold solution (0.2 g of HAuCl<sub>4</sub> • 4H<sub>2</sub>O in 1 L of water) was heated to 80 °C under vigorous stirring. The pH of the solution was adjusted to 9.0 with 0.2 M NaOH, followed by addition of 1.0 g of CeO<sub>2</sub> (Degussa, Adnano 90, specific surface area: 90 m<sup>2</sup>/g). Stirring was continued for 2 h, after which the suspension was cooled to room temperature. Solids were then filtrated and exhaustively washed with 200 ml of distilled water. The solid thus obtained was dried for 12 h at 80 °C, and calcined in air at 300 °C for 3 h.

## 2. Oxidation of alcohols by supported gold catalysts using aqueous H<sub>2</sub>O<sub>2</sub>.

**General procedure for the oxidation of alcohols:** The alcohol (10 mmol), supported gold catalysts (Au: 0.1 mmol) and water (10 ml) was charged in a flask (50 ml) with a magnetic stirring bar and a reflux condenser. After the mixture was stirred at 90 °C for 10 min under N<sub>2</sub> atmosphere, an aqueous solution of H<sub>2</sub>O<sub>2</sub> (5 %, 15 mmol for secondary alcohols and cinnamyl alcohol, 25 mmol for primary alcohols) was dropwise added over the course of 1 h, followed by heating at 90 °C for additional 5 min. The reactants and products were extracted with ethyl acetate, and analyzed on a Shimadzu GC-17A gas chromatograph equipped with an Agilent Technologies Inc. HP-FFAP column (30 m×0.25 mm) and a flame ionization detector (FID).

**Recovery and reuse of Au/TiO<sub>2</sub>:** The catalyst was collected after filtration washed with water and heated at 120 °C for 12 h. Then the catalyst was used for next reaction.

**Hectogram-scale oxidation of 1-hexanol:** 1-hexanol (100g, 0.98 mol) and 1 wt % Au/TiO<sub>2</sub> (Au 10 mmol) were charged in a 2 L round-bottomed flask with a magnetic stirring bar and a reflux condenser. After the mixture was vigorously stirred at 90 °C for 10 min, an aqueous solution of H<sub>2</sub>O<sub>2</sub> (5%, 3 mol) was added dropwise. The mixture was heated at 90 °C for 2.5 h, and then cooled to room temperature. The organic phase was separated and washed with saturated aqueous solution of Na<sub>2</sub>S<sub>2</sub>O<sub>3</sub> (50 ml). After distillation, hexanoic acid (105.6 g, 93%) was obtained as a colorless liquid.

## 3. Methods

### TEM

Transmission electron microscopy (TEM) images for supported gold catalysts were taken with a JEOL 2011 electron microscope operating at 200 kV. Before being transferred into the TEM chamber, the samples dispersed with ethanol were deposited onto a carbon-coated copper grid and then quickly moved into the vacuum evaporator. The size distribution of the metal nanoclusters was determined by measuring about 200 random particles on the images.

## XPS

XPS analysis was performed using a Perkin Elmer PHI 5000C system equipped with a hemispherical electron energy analyzer. The MgK $\alpha$  ( $h\nu = 1253.6$  eV) was operated at 15 kV and 20 mA. The energy scale was internally calibrated by setting the C1s peak at 284.6 eV.

## 4. TEM images of supported gold catalysts.

**Fig. S1 TEM image and size distribution of Mintek 1 wt % Au/TiO<sub>2</sub> calcined at 300 °C for 2 h.**

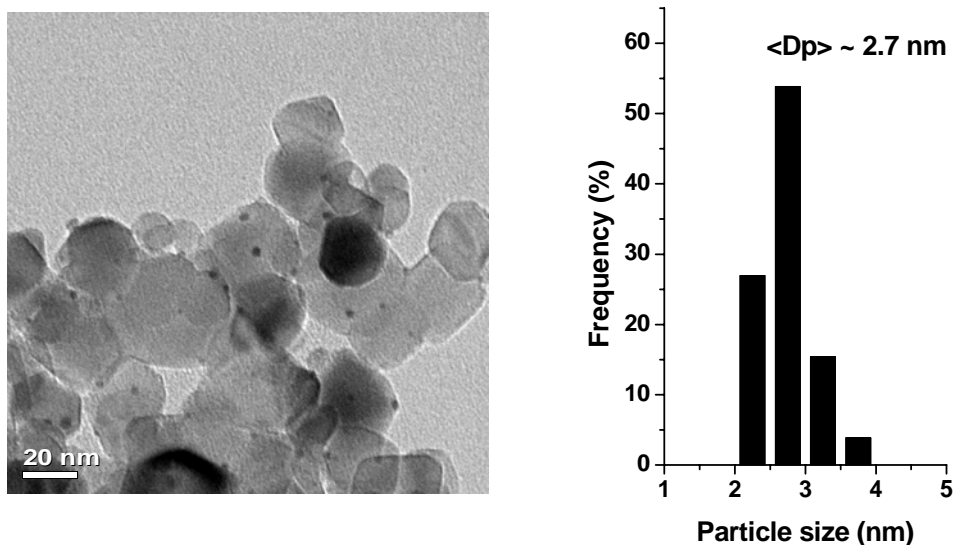

**Fig. S2 TEM image and size distribution of Mintek 1 wt % Au/TiO<sub>2</sub> calcined at 400 °C for 2 h.**

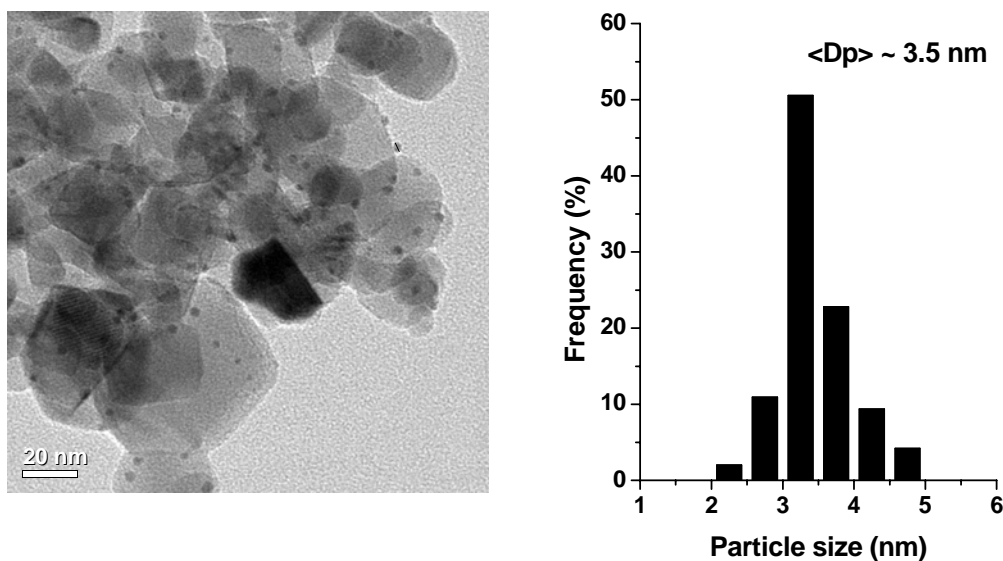

**Fig. S3 TEM image and size distribution of Mintek 1 wt % Au/TiO<sub>2</sub> calcined at 500 °C for 2 h.**

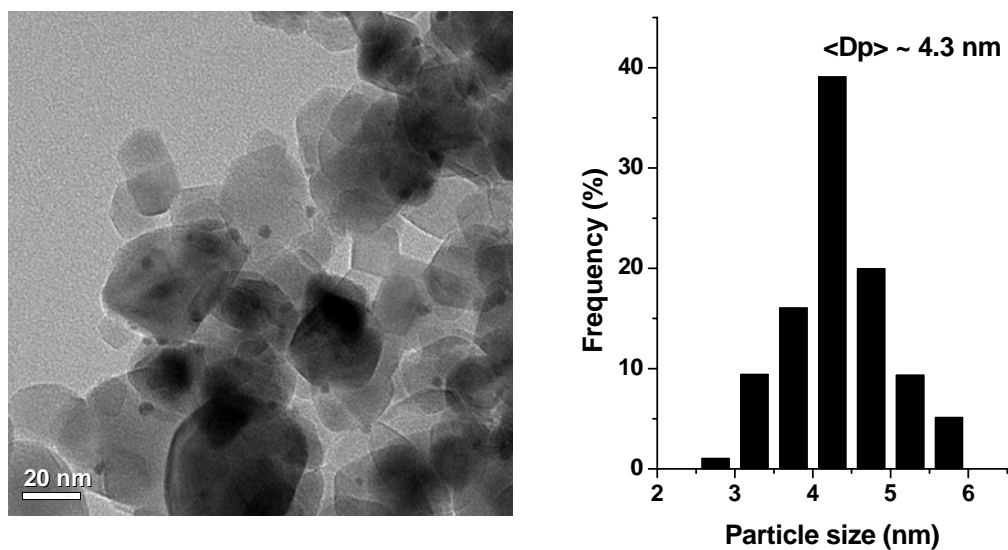

**Fig. S4 TEM image and size distribution of Mintek 1 wt % Au/TiO<sub>2</sub> calcined at 500 °C for 6 h.**

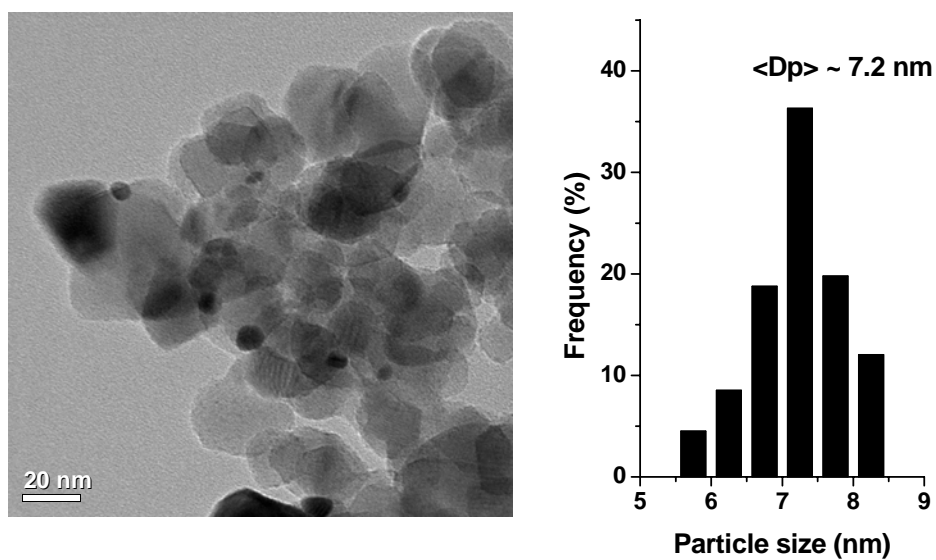

**Fig S5 TEM image and size distribution of Mintek 1 wt % Au/TiO<sub>2</sub> after five runs.**

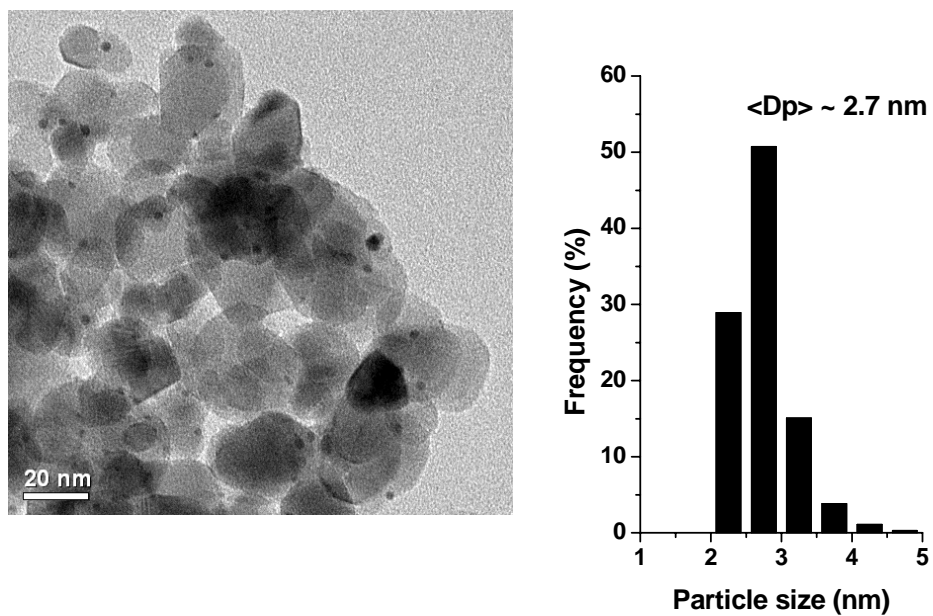

**Fig S6 TEM image and size distribution of 1.5 wt % TiO<sub>2</sub> (WGC).**

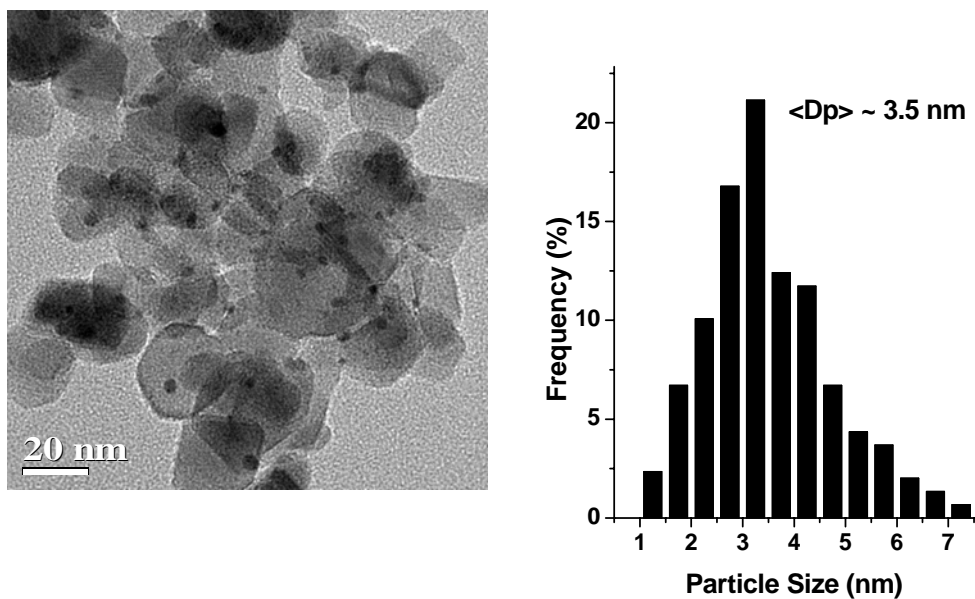

**Fig. S7 XPS spectra of Mintek 1 wt % Au/TiO<sub>2</sub>: a) before reaction; b) after five runs.**

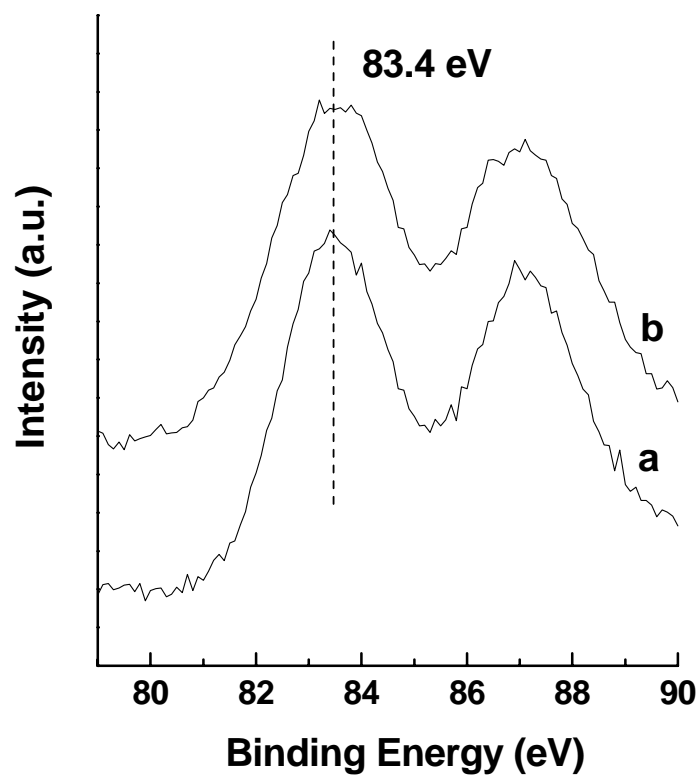

**Fig. S8 Proposed mechanism of the alcohol oxidation by supported gold catalysts using aqueous H<sub>2</sub>O<sub>2</sub>:**

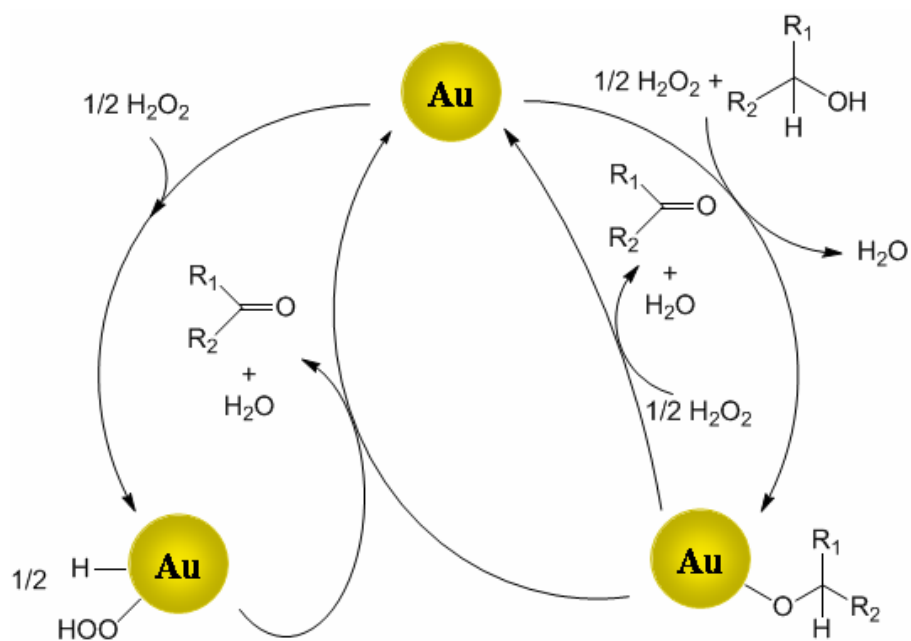

Supplement: b820197h.pdf [file b820197h.pdf]
